# Supplementary material for: Inferring flow energy, space scales, and timescales: freely drifting vs. fixed-point observations
Source: Copernicus journal article supplement (doi:10.5194/npg-31-571-2024), 2024-12-05
Supplement: Supplementary file 1 [file npg-31-571-2024-supplement.zip]

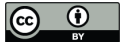

*Supplement of*

## **Inferring flow energy, space scales, and timescales: freely drifting vs. fixed-point observations**

**Aurelien Luigi Serge Ponte et al.**

*Correspondence to:* Aurelien Luigi Serge Ponte ([aurelien.ponte@ifremer.fr](mailto:aurelien.ponte@ifremer.fr))

- [npg-31-571-2024-supplement-title-page.pdf](#)
- [movie\\_REF.mp4](#)
- [movie\\_REG\[0.02\].mp4](#)
- [movie\\_REG\[4\].mp4](#)

The copyright of individual parts of the supplement might differ from the article licence.
